# Supplementary material for: Scaling Chromosomes for an Evolutionary Karyotype: A Chromosomal Tradeoff between Size and Number across Woody Species
Source: PubMed Central journal article supplement (PMC4684206; doi:10.1371/journal.pone.0144669), 2015-12-14
Supplement: pone.0144669.s001.pdf [file pone.0144669.s001.pdf]

## 1 S1 Table

2

| Species                         | Family          | LF | TCN | m-CN | KAI   | LcN | SeN |
|---------------------------------|-----------------|----|-----|------|-------|-----|-----|
| <i>Acacia catechu</i>           | Mimosaceae      | D  | 26  | 10   | 65.32 | 10  | 16  |
| <i>Acanthopanax senticosus</i>  | Araliaceae      | D  | 48  | 18   | 65.06 | 26  | 22  |
| <i>Acanthopanax trifoliatum</i> | Araliaceae      | E  | 48  | 14   | 67.17 | 26  | 22  |
| <i>Actinidia arguta</i>         | Actinidiaceae   | D  | 116 | 92   | 57.82 | 52  | 64  |
| <i>Actinidia callosa</i>        | Actinidiaceae   | D  | 58  | 52   | 69.02 | 20  | 38  |
| <i>Actinidia melliana</i>       | Actinidiaceae   | E  | 58  | 48   | 57.74 | 32  | 26  |
| <i>Actinidia chinensis</i>      | Actinidiaceae   | D  | 58  | 52   | 57.17 | 24  | 34  |
| <i>Actinidia eriantha</i>       | Actinidiaceae   | D  | 58  | 52   | 57.06 | 26  | 32  |
| <i>Actinidia hemsleyana</i>     | Actinidiaceae   | D  | 58  | 54   | 55.58 | 26  | 32  |
| <i>Actinidia kolomikta</i>      | Actinidiaceae   | D  | 58  | 52   | 58.74 | 28  | 30  |
| <i>Actinidia latifolia</i>      | Actinidiaceae   | D  | 58  | 56   | 55.49 | 28  | 30  |
| <i>Actinidia macrosperma</i>    | Actinidiaceae   | D  | 116 | 76   | 60.75 | 54  | 62  |
| <i>Actinidia polygama</i>       | Actinidiaceae   | D  | 58  | 32   | 61.87 | 28  | 30  |
| <i>Ailanthus altissima</i>      | Simaroubaceae   | D  | 64  | 32   | 65.6  | 30  | 32  |
| <i>Albizia julibrissin</i>      | Leguminosae     | D  | 26  | 12   | 64.4  | 14  | 12  |
| <i>Ambroma augusta</i>          | Sterculiaceae   | E  | 20  | 10   | 65.6  | 10  | 10  |
| <i>Amygdalus persica</i>        | Rosaceae        | D  | 16  | 14   | 69    | 4   | 12  |
| <i>Amygdalus mira</i>           | Rosaceae        | D  | 16  | 10   | 64.17 | 6   | 10  |
| <i>Amygdalus mongolica</i>      | Rosaceae        | D  | 16  | 9    | 60.86 | 5   | 11  |
| <i>Amygdalus tangutica</i>      | Rosaceae        | D  | 16  | 10   | 61.97 | 6   | 10  |
| <i>Aralia chinensis</i>         | Araliaceae      | E  | 24  | 20   | 60.4  | 10  | 14  |
| <i>Ardisia caudata</i>          | Myrsinaceae     | E  | 46  | 40   | 58.21 | 24  | 22  |
| <i>Armeniaca sibirica</i>       | Rosaceae        | D  | 16  | 10   | 61.65 | 4   | 12  |
| <i>Bauhinia blakeana</i>        | Leguminosae     | E  | 28  | 16   | 62.89 | 12  | 16  |
| <i>Bauhinia pernervosa</i>      | Leguminosae     | E  | 28  | 22   | 60.32 | 16  | 12  |
| <i>Bixa orellana</i>            | Bixaceae        | E  | 14  | 10   | 61.01 | 6   | 8   |
| <i>Broussonetia papyrifera</i>  | Moraceae        | D  | 28  | 14   | 64.53 | 10  | 18  |
| <i>Chaenomeles speciosa</i>     | Rosaceae        | D  | 34  | 20   | 65.68 | 18  | 16  |
| <i>Cajanus cajan</i>            | Fabaceae        | E  | 22  | 20   | 57.9  | 14  | 8   |
| <i>Callicarpa bodinieri</i>     | Verbenaceae     | D  | 40  | 20   | 65.49 | 18  | 22  |
| <i>Canarium pimela</i>          | Burseraceae     | E  | 48  | 46   | 55.62 | 18  | 30  |
| <i>Canarium tonkinense</i>      | Burseraceae     | E  | 48  | 36   | 59.79 | 22  | 26  |
| <i>Carya cathayensis</i>        | Juglandaceae    | D  | 32  | 26   | 59.67 | 14  | 18  |
| <i>Cassia siamea</i>            | Caesalpiniaceae | E  | 28  | 10   | 65.86 | 12  | 16  |
| <i>Cassia sophera</i>           | Leguminosae     | E  | 14  | 4    | 62.21 | 6   | 8   |
| <i>Castanea crenata</i>         | Fagaceae        | D  | 24  | 16   | 61.9  | 10  | 14  |
| <i>Castanea dentata</i>         | Fagaceae        | D  | 24  | 18   | 61.46 | 10  | 14  |
| <i>Castanea mollissima</i>      | Fagaceae        | D  | 24  | 18   | 69.33 | 6   | 18  |
| <i>Castanea mollissima</i>      | Fagaceae        | D  | 24  | 14   | 60.12 | 10  | 14  |
| <i>Castanea seguinii</i>        | Fagaceae        | D  | 24  | 14   | 62.25 | 10  | 14  |
| <i>Cerasus tomentosa</i>        | Rosaceae        | D  | 16  | 12   | 58.38 | 8   | 8   |

|                               |                      |   |    |    |       |    |    |
|-------------------------------|----------------------|---|----|----|-------|----|----|
| <i>Cerasus humilis</i>        | <i>Rosaceae</i>      | D | 16 | 8  | 61.6  | 4  | 12 |
| <i>Cerasus serrulata</i>      | <i>Rosaceae</i>      | D | 16 | 12 | 60.13 | 6  | 10 |
| <i>Cinnamomum bodinieri</i>   | <i>Lauraceae</i>     | E | 24 | 18 | 59.33 | 10 | 14 |
| <i>Cipadessa baccifera</i>    | <i>Meliaceae</i>     | E | 28 | 22 | 60.48 | 12 | 16 |
| <i>Citrus reticulata</i>      | <i>Rutaceae</i>      | E | 18 | 13 | 59    | 9  | 9  |
| <i>Citrus chuana</i>          | <i>Rutaceae</i>      | E | 18 | 12 | 69.01 | 6  | 12 |
| <i>Citrus daoixianensis</i>   | <i>Rutaceae</i>      | E | 18 | 10 | 62.51 | 10 | 8  |
| <i>Citrus hongheensis</i>     | <i>Rutaceae</i>      | E | 18 | 7  | 63.41 | 6  | 12 |
| <i>Citrus sulcata</i>         | <i>Rutaceae</i>      | E | 18 | 14 | 59.83 | 9  | 9  |
| <i>Citrus tangerita</i>       | <i>Rutaceae</i>      | E | 18 | 10 | 61.16 | 6  | 12 |
| <i>Clausena lansium</i>       | <i>Rutaceae</i>      | E | 18 | 16 | 55.8  | 6  | 12 |
| <i>Clematis aethusifolia</i>  | <i>Ranunculaceae</i> | D | 16 | 10 | 68.36 | 8  | 8  |
| <i>Clematis chinensis</i>     | <i>Ranunculaceae</i> | E | 16 | 10 | 66.26 | 8  | 8  |
| <i>Clematis finetiana</i>     | <i>Ranunculaceae</i> | E | 16 | 6  | 69.21 | 8  | 8  |
| <i>Clematis florida</i>       | <i>Ranunculaceae</i> | E | 16 | 10 | 65.93 | 10 | 6  |
| <i>Clematis heracleifolia</i> | <i>Ranunculaceae</i> | D | 16 | 10 | 65.84 | 10 | 6  |
| <i>Corylus heterophylla</i>   | <i>Corylaceae</i>    | D | 22 | 20 | 55    | 10 | 12 |
| <i>Crataegus altaica</i>      | <i>Rosaceae</i>      | D | 68 | 62 | 56.62 | 36 | 32 |
| <i>Crataegus cuneata</i>      | <i>Rosaceae</i>      | D | 34 | 26 | 60.22 | 14 | 20 |
| <i>Crataegus hupehensis</i>   | <i>Rosaceae</i>      | D | 34 | 28 | 60.76 | 22 | 12 |
| <i>Crataegus kansuensis</i>   | <i>Rosaceae</i>      | D | 34 | 34 | 53.38 | 18 | 16 |
| <i>Crataegus maximowiczii</i> | <i>Rosaceae</i>      | D | 51 | 51 | 65.41 | 27 | 24 |
| <i>Crataegus pinnatifida</i>  | <i>Rosaceae</i>      | D | 34 | 28 | 58.03 | 14 | 20 |
| <i>Crataegus pinnatifida</i>  | <i>Rosaceae</i>      | D | 51 | 51 | 55.27 | 30 | 21 |
| <i>Crataegus sanguinea</i>    | <i>Rosaceae</i>      | D | 68 | 64 | 57.02 | 30 | 38 |
| <i>Crataegus scabrifolia</i>  | <i>Rosaceae</i>      | D | 34 | 26 | 59.4  | 14 | 20 |
| <i>Crataegus songorica</i>    | <i>Rosaceae</i>      | D | 68 | 66 | 57.61 | 28 | 40 |
| <i>Crataegus wilsonii</i>     | <i>Rosaceae</i>      | D | 34 | 32 | 56.92 | 14 | 20 |
| <i>Croton tiglium</i>         | <i>Euphorbiaceae</i> | E | 20 | 6  | 63.91 | 10 | 10 |
| <i>Datura stramonium</i>      | <i>Solanaceae</i>    | E | 24 | 18 | 58.88 | 12 | 12 |
| <i>Dichroa febrifuga</i>      | <i>Saxifragaceae</i> | D | 20 | 6  | 65.56 | 10 | 10 |
| <i>Diospyros discolor</i>     | <i>Ebenaceae</i>     | E | 30 | 18 | 61.63 | 14 | 16 |
| <i>Diospyros lotus</i>        | <i>Ebenaceae</i>     | D | 32 | 18 | 61.34 | 14 | 18 |
| <i>Diospyros rhombifolia</i>  | <i>Ebenaceae</i>     | D | 30 | 26 | 68.16 | 14 | 16 |
| <i>Diospyros glaucifolia</i>  | <i>Ebenaceae</i>     | D | 30 | 30 | 57.68 | 10 | 20 |
| <i>Diospyros oleifera</i>     | <i>Ebenaceae</i>     | D | 30 | 22 | 59.31 | 12 | 18 |
| <i>Dipteronia dyerana</i>     | <i>Aceraceae</i>     | D | 22 | 14 | 60.62 | 8  | 14 |
| <i>Dracaena cambodiana</i>    | <i>Liliaceae</i>     | E | 40 | 24 | 62.48 | 16 | 24 |
| <i>Duranta repens</i>         | <i>Verbenaceae</i>   | E | 34 | 14 | 67.05 | 18 | 16 |
| <i>Elaeagnus pungens</i>      | <i>Elaeagnaceae</i>  | E | 28 | 8  | 67.86 | 6  | 22 |
| <i>Flueggea suffruticosa</i>  | <i>Euphorbiaceae</i> | D | 26 | 10 | 64.47 | 12 | 14 |
| <i>Forsythia suspensa</i>     | <i>Oleaceae</i>      | D | 28 | 12 | 64.02 | 12 | 16 |
| <i>Fortunella obovata</i>     | <i>Rutaceae</i>      | E | 18 | 11 | 60.83 | 11 | 7  |
| <i>Fortunella margarita</i>   | <i>Rutaceae</i>      | E | 18 | 13 | 59.76 | 8  | 10 |

|                                 |                       |   |    |    |       |    |    |
|---------------------------------|-----------------------|---|----|----|-------|----|----|
| <i>Fraxinus chinensis</i>       | <i>Oleaceae</i>       | D | 46 | 22 | 64.16 | 22 | 24 |
| <i>Helicteres angustifolia</i>  | <i>Sterculiaceae</i>  | D | 18 | 16 | 59.55 | 8  | 10 |
| <i>Hippophae rhamnoides</i>     | <i>Elaeagnaceae</i>   | D | 24 | 20 | 57.47 | 8  | 16 |
| <i>Hodgsonia macrocarpa</i>     | <i>Cucurbitaceae</i>  | E | 18 | 10 | 60.97 | 8  | 10 |
| <i>Indigofera suffruticosa</i>  | <i>Leguminosae</i>    | D | 16 | 14 | 56.78 | 6  | 10 |
| <i>Indigofera zollingeriana</i> | <i>Leguminosae</i>    | D | 20 | 12 | 63.29 | 10 | 10 |
| <i>Juglans cathayensis</i>      | <i>Juglandaceae</i>   | D | 32 | 26 | 62.02 | 12 | 20 |
| <i>Juglans mandshurica</i>      | <i>Juglandaceae</i>   | D | 32 | 26 | 61    | 18 | 14 |
| <i>Kadsura japonica</i>         | <i>Schisandraceae</i> | E | 28 | 26 | 55.85 | 14 | 14 |
| <i>Leea macrophylla</i>         | <i>Leeaceae</i>       | E | 48 | 28 | 63.17 | 24 | 24 |
| <i>Liquidambar formosana</i>    | <i>Hamamelidaceae</i> | D | 26 | 6  | 66.44 | 10 | 16 |
| <i>Lonicera japonica</i>        | <i>Caprifoliaceae</i> | D | 18 | 2  | 66.6  | 8  | 10 |
| <i>Lycium chinense</i>          | <i>Solanaceae</i>     | D | 24 | 18 | 59.64 | 8  | 16 |
| <i>Macrocarpium officinale</i>  | <i>Cornaceae</i>      | D | 18 | 8  | 64.41 | 6  | 12 |
| <i>Mahonia fortunei</i>         | <i>Berberidaceae</i>  | E | 28 | 24 | 58.33 | 14 | 14 |
| <i>Malus formosana</i>          | <i>Rosaceae</i>       | D | 34 | 26 | 68.54 | 16 | 18 |
| <i>Malus asiatica</i>           | <i>Rosaceae</i>       | D | 34 | 30 | 57.91 | 16 | 18 |
| <i>Malus asiatica</i>           | <i>Rosaceae</i>       | D | 68 | 42 | 60.31 | 26 | 42 |
| <i>Malus asiatica</i>           | <i>Rosaceae</i>       | D | 34 | 22 | 62.21 | 14 | 20 |
| <i>Malus asiatica</i>           | <i>Rosaceae</i>       | D | 34 | 28 | 69.01 | 14 | 20 |
| <i>Malus halliana</i>           | <i>Rosaceae</i>       | D | 51 | 33 | 60.42 | 18 | 33 |
| <i>Malus kansuensis</i>         | <i>Rosaceae</i>       | D | 34 | 18 | 63.57 | 16 | 18 |
| <i>Malus komarovii</i>          | <i>Rosaceae</i>       | D | 34 | 32 | 57.39 | 20 | 14 |
| <i>Malus melliana</i>           | <i>Rosaceae</i>       | D | 34 | 30 | 55.74 | 14 | 20 |
| <i>Malus prunifolia</i>         | <i>Rosaceae</i>       | D | 34 | 30 | 60.17 | 16 | 18 |
| <i>Malus pumila</i>             | <i>Rosaceae</i>       | D | 34 | 26 | 58.27 | 18 | 16 |
| <i>Malus pumila</i>             | <i>Rosaceae</i>       | D | 34 | 26 | 60.07 | 16 | 18 |
| <i>Malus sieboldii</i>          | <i>Rosaceae</i>       | D | 51 | 39 | 60.4  | 21 | 30 |
| <i>Malus sieversii</i>          | <i>Rosaceae</i>       | D | 34 | 24 | 61.04 | 12 | 22 |
| <i>Malus sikkimensis</i>        | <i>Rosaceae</i>       | D | 68 | 62 | 57.75 | 34 | 34 |
| <i>Malus toringoides</i>        | <i>Rosaceae</i>       | D | 34 | 30 | 57.65 | 16 | 18 |
| <i>Malus transitoria</i>        | <i>Rosaceae</i>       | D | 34 | 12 | 63.27 | 18 | 16 |
| <i>Malus xiaojinensis</i>       | <i>Rosaceae</i>       | D | 68 | 64 | 55.68 | 26 | 42 |
| <i>Malus honanensis</i>         | <i>Rosaceae</i>       | D | 34 | 18 | 65.94 | 12 | 22 |
| <i>Malus hupehensis</i>         | <i>Rosaceae</i>       | D | 51 | 45 | 59.16 | 24 | 27 |
| <i>Malus ombrophila</i>         | <i>Rosaceae</i>       | D | 34 | 20 | 62.31 | 12 | 22 |
| <i>Malus prattii</i>            | <i>Rosaceae</i>       | D | 34 | 32 | 58.06 | 14 | 20 |
| <i>Malus yunnanensis</i>        | <i>Rosaceae</i>       | D | 34 | 20 | 62.34 | 18 | 16 |
| <i>Mangifera sylvatica</i>      | <i>Anacardiaceae</i>  | E | 40 | 32 | 68.84 | 16 | 24 |
| <i>Melia azedarach</i>          | <i>Meliaceae</i>      | D | 28 | 20 | 61.01 | 16 | 12 |
| <i>Morus cathayana</i>          | <i>Moraceae</i>       | D | 28 | 26 | 54.89 | 10 | 18 |
| <i>Morus mongolica</i>          | <i>Moraceae</i>       | D | 28 | 26 | 57.3  | 12 | 16 |
| <i>Mucuna sempervirens</i>      | <i>Fabaceae</i>       | E | 22 | 8  | 64.67 | 8  | 14 |
| <i>Murraya exotica</i>          | <i>Rutaceae</i>       | E | 18 | 12 | 58.83 | 10 | 8  |

|                               |                       |   |    |    |       |    |    |
|-------------------------------|-----------------------|---|----|----|-------|----|----|
| <i>Neolitsea menglaensis</i>  | <i>Lauraceae</i>      | E | 24 | 6  | 69.47 | 12 | 12 |
| <i>Oroxylum indicum</i>       | <i>Bignoniaceae</i>   | D | 28 | 26 | 58    | 14 | 14 |
| <i>Phellodendron amurense</i> | <i>Rutaceae</i>       | D | 78 | 26 | 67.66 | 32 | 46 |
| <i>Plumbago zeylanica</i>     | <i>Plumbaginaceae</i> | E | 28 | 18 | 63.43 | 12 | 16 |
| <i>Poncirus trifoliata</i>    | <i>Rutaceae</i>       | D | 18 | 13 | 59.82 | 12 | 6  |
| <i>Poncirus trifoliata</i>    | <i>Rutaceae</i>       | D | 18 | 12 | 59.9  | 8  | 10 |
| <i>Priotropis cytisoides</i>  | <i>Leguminosae</i>    | D | 16 | 12 | 58.94 | 8  | 8  |
| <i>Prunus mume</i>            | <i>Rosaceae</i>       | D | 16 | 12 | 60.59 | 6  | 10 |
| <i>Prunus simonii</i>         | <i>Rosaceae</i>       | D | 16 | 10 | 61.4  | 10 | 6  |
| <i>Prunus ussuriensis</i>     | <i>Rosaceae</i>       | D | 16 | 10 | 61.69 | 8  | 8  |
| <i>Prunus cerasifera</i>      | <i>Rosaceae</i>       | D | 16 | 12 | 59.45 | 8  | 8  |
| <i>Psidium guajava</i>        | <i>Myrtaceae</i>      | E | 22 | 6  | 64.54 | 8  | 14 |
| <i>Pyracantha fortuneana</i>  | <i>Rosaceae</i>       | E | 34 | 14 | 66.13 | 14 | 20 |
| <i>Pyrus betulaeifolia</i>    | <i>Rosaceae</i>       | D | 34 | 22 | 61.62 | 14 | 20 |
| <i>Pyrus bretschneideri</i>   | <i>Rosaceae</i>       | D | 34 | 26 | 59.08 | 12 | 22 |
| <i>Pyrus bretschneideri</i>   | <i>Rosaceae</i>       | D | 34 | 8  | 67.13 | 14 | 20 |
| <i>Pyrus calleryana</i>       | <i>Rosaceae</i>       | D | 34 | 26 | 60.83 | 12 | 22 |
| <i>Pyrus pyrifolia</i>        | <i>Rosaceae</i>       | D | 34 | 20 | 61.88 | 16 | 18 |
| <i>Pyrus armeniacaefolia</i>  | <i>Rosaceae</i>       | D | 51 | 24 | 64.73 | 24 | 27 |
| <i>Pyrus hopeiensis</i>       | <i>Rosaceae</i>       | D | 34 | 16 | 64.35 | 14 | 20 |
| <i>Pyrus pashia</i>           | <i>Rosaceae</i>       | D | 34 | 18 | 63.46 | 14 | 20 |
| <i>Pyrus phaeocarpa</i>       | <i>Rosaceae</i>       | D | 34 | 22 | 61.29 | 12 | 22 |
| <i>Pyrus serrulata</i>        | <i>Rosaceae</i>       | D | 34 | 14 | 64.09 | 16 | 18 |
| <i>Pyrus sinkiangensis</i>    | <i>Rosaceae</i>       | D | 34 | 18 | 62.71 | 14 | 20 |
| <i>Pyrus xerophila</i>        | <i>Rosaceae</i>       | D | 34 | 22 | 62.83 | 16 | 18 |
| <i>Rauvolfia verticillata</i> | <i>Apocynaceae</i>    | E | 22 | 12 | 63.34 | 10 | 12 |
| <i>Rauvolfia verticillata</i> | <i>Apocynaceae</i>    | E | 22 | 4  | 70.36 | 10 | 12 |
| <i>Rhus chinensis</i>         | <i>Anacardiaceae</i>  | D | 30 | 14 | 65.57 | 14 | 16 |
| <i>Ribes rubrum</i>           | <i>Saxifragaceae</i>  | D | 16 | 16 | 56.99 | 6  | 10 |
| <i>Ribes burejense</i>        | <i>Saxifragaceae</i>  | D | 16 | 16 | 54.87 | 6  | 10 |
| <i>Ribes mandshuricum</i>     | <i>Saxifragaceae</i>  | D | 16 | 12 | 58.77 | 8  | 8  |
| <i>Ricinus communis</i>       | <i>Euphorbiaceae</i>  | E | 20 | 14 | 58.35 | 8  | 12 |
| <i>Rosa laevigata</i>         | <i>Rosaceae</i>       | E | 14 | 6  | 66.96 | 6  | 8  |
| <i>Rubus crataegifolius</i>   | <i>Rosaceae</i>       | D | 21 | 9  | 63.4  | 12 | 9  |
| <i>Rubus idaeus</i>           | <i>Rosaceae</i>       | D | 14 | 14 | 59.17 | 8  | 6  |
| <i>Rubus komarovi</i>         | <i>Rosaceae</i>       | D | 14 | 12 | 60.71 | 6  | 8  |
| <i>Rubus sachalinensis</i>    | <i>Rosaceae</i>       | D | 14 | 10 | 61.33 | 6  | 8  |
| <i>Rubus xanthocarpus</i>     | <i>Rosaceae</i>       | D | 14 | 10 | 62.86 | 6  | 8  |
| <i>Rubus idaeus</i>           | <i>Rosaceae</i>       | D | 21 | 18 | 59.34 | 9  | 12 |
| <i>Rubus parvifolius</i>      | <i>Rosaceae</i>       | D | 28 | 24 | 60.26 | 18 | 10 |
| <i>Salix myrtillacea</i>      | <i>Salicaceae</i>     | E | 28 | 16 | 64.23 | 10 | 18 |
| <i>Sambucus williamsii</i>    | <i>Caprifoliaceae</i> | D | 36 | 12 | 68.06 | 20 | 16 |
| <i>Sarcandra glabra</i>       | <i>Chloranthaceae</i> | E | 30 | 12 | 69.33 | 12 | 18 |
| <i>Schisandra chinensis</i>   | <i>Schisandraceae</i> | D | 28 | 24 | 57.11 | 16 | 12 |

|                                    |                       |   |    |    |       |    |    |
|------------------------------------|-----------------------|---|----|----|-------|----|----|
| <i>Solanum verbascifolium</i>      | <i>Solanaceae</i>     | D | 24 | 10 | 64.84 | 10 | 14 |
| <i>Sophora davidii</i>             | <i>Leguminosae</i>    | D | 18 | 12 | 63.14 | 8  | 10 |
| <i>Sophora flavescens</i>          | <i>Fabaceae</i>       | D | 18 | 12 | 64.42 | 10 | 8  |
| <i>Sophora tonkinensis</i>         | <i>Leguminosae</i>    | E | 18 | 8  | 62.87 | 8  | 10 |
| <i>Spiraea salicifolia</i>         | <i>Rosaceae</i>       | D | 18 | 4  | 67.27 | 8  | 10 |
| <i>Syzygium jambos</i>             | <i>Myrtaceae</i>      | D | 44 | 28 | 61.67 | 18 | 26 |
| <i>Terminalia chebula</i>          | <i>Combretaceae</i>   | D | 48 | 42 | 57.96 | 14 | 34 |
| <i>Thespesia lampas</i>            | <i>Malvaceae</i>      | E | 20 | 6  | 66.37 | 10 | 10 |
| <i>Toxicodendron vernicifluum</i>  | <i>Anacardiaceae</i>  | D | 30 | 4  | 68.88 | 14 | 16 |
| <i>Trachelospermum jasminoides</i> | <i>Apocynaceae</i>    | E | 20 | 12 | 60.58 | 10 | 10 |
| <i>Ulmus pumila</i>                | <i>Ulmaceae</i>       | D | 28 | 6  | 74.92 | 14 | 14 |
| <i>Urena procumbens</i>            | <i>Malvaceae</i>      | D | 38 | 12 | 66.01 | 18 | 20 |
| <i>Vaccinium corymbosum</i>        | <i>Ericaceae</i>      | E | 48 | 40 | 58.16 | 24 | 24 |
| <i>Vaccinium vitis-idaea</i>       | <i>Ericaceae</i>      | E | 24 | 22 | 56.91 | 10 | 14 |
| <i>Viburnum utile</i>              | <i>Caprifoliaceae</i> | E | 18 | 12 | 60.22 | 6  | 12 |
| <i>Vitis negundo</i>               | <i>Verbenaceae</i>    | D | 34 | 34 | 55.58 | 16 | 18 |
| <i>Vitis rotundifolia</i>          | <i>Verbenaceae</i>    | D | 34 | 16 | 64.06 | 16 | 18 |
| <i>Ziziphus jujuba</i>             | <i>Rhamnaceae</i>     | D | 24 | 16 | 62.2  | 10 | 14 |

3
